# Supplementary material
Source: PubMed Central journal article supplement (PMC10463171)
Supplement: jamacardiol-e233342-s003.pdf [file jamacardiol-e233342-s003.pdf]

## Data Sharing Statement

Desai. Mavacamten in Patients With Hypertrophic Cardiomyopathy Referred for Septal Reduction. *JAMA Cardiol.* Published August 28, 2023. doi:10.1001/jamacardio.2023.3342

### Data

**Data available:** No

### Additional Information

**Explanation for why data not available:** Bristol Myers Squibb policy on data sharing may be found at <https://www.bms.com/researchers-and-partners/independent-research/data-sharing-request-process.html>
